# Supplementary material for: Istradefylline protects from cisplatin-induced nephrotoxicity and peripheral neuropathy while preserving cisplatin antitumor effects
Source: PubMed Central journal article supplement (PMC9663157; doi:10.1172/jci152924), 2022-11-15
Supplement: jci-132-152924-s127.pdf [file jci-132-152924-s127.pdf]

**Kidney**

| N=6           | Vehicle     | KW          | Cisplatin                   | Cisplatin + KW               |
|---------------|-------------|-------------|-----------------------------|------------------------------|
| <i>I11b</i>   | 1.00 ± 0.03 | 1.19 ± 0.10 | 1.34 ± 0.09 <sup>0.07</sup> | 0.78 ± 0.12 <sup>°°</sup>    |
| <i>Ccl2</i>   | 1.00 ± 0.01 | 1.42 ± 0.20 | 8.20 ± 2.48 <sup>**</sup>   | 2.38 ± 0.99 <sup>°</sup>     |
| <i>Selp</i>   | 1.00 ± 0.08 | 1.01 ± 0.12 | 1.07 ± 0.09                 | 0.94 ± 0.14                  |
| <i>C3</i>     | 1.00 ± 0.18 | 1.32 ± 0.72 | 21.44 ± 6.42 <sup>**</sup>  | 8.08 ± 2.29 <sup>°</sup>     |
| <i>Cxcl10</i> | 1.00 ± 0.12 | 1.38 ± 0.12 | 9.11 ± 2.86 <sup>*</sup>    | 2.53 ± 1.92 <sup>°</sup>     |
| <i>Cxcl12</i> | 1.00 ± 0.08 | 1.34 ± 0.13 | 36.67 ± 8.63 <sup>***</sup> | 16.85 ± 6.70 <sup>0.07</sup> |
| <i>Tnf</i>    | 1.00 ± 0.08 | 1.26 ± 0.38 | 4.75 ± 0.79 <sup>***</sup>  | 2.05 ± 0.54 <sup>°°</sup>    |
| <i>Il6</i>    | 1.00 ± 0.07 | 1.04 ± 0.20 | 22.67 ± 4.75 <sup>***</sup> | 9.46 ± 3.61 <sup>°</sup>     |

**DRG**

| N=5           | Vehicle     | KW          | Cisplatin                | Cisplatin + KW             |
|---------------|-------------|-------------|--------------------------|----------------------------|
| <i>I11b</i>   | 1.00 ± 0.08 | 0.99 ± 0.20 | 1.48 ± 0.31              | 0.81 ± 0.12 <sup>°°</sup>  |
| <i>Ccl2</i>   | 1.00 ± 0.15 | 0.91 ± 0.17 | 1.63 ± 0.23 <sup>*</sup> | 0.99 ± 0.17 <sup>°°</sup>  |
| <i>Selp</i>   | 1.00 ± 0.11 | 0.90 ± 0.27 | 1.39 ± 0.15              | 1.04 ± 0.10                |
| <i>C3</i>     | 1.00 ± 0.11 | 0.89 ± 0.15 | 1.44 ± 0.33              | 0.70 ± 0.15 <sup>°°°</sup> |
| <i>Cxcl10</i> | 1.00 ± 0.13 | 0.46 ± 0.04 | 0.56 ± 0.16              | 0.72 ± 0.21                |
| <i>Cxcl12</i> | 1.00 ± 0.10 | 0.98 ± 0.22 | 1.00 ± 0.33              | 1.09 ± 0.09                |
| <i>Tnf</i>    | 1.00 ± 0.16 | 0.64 ± 0.03 | 1.30 ± 0.36              | 0.65 ± 0.04 <sup>°</sup>   |
| <i>Il6</i>    | 1.00 ± 0.16 | 1.06 ± 0.22 | 1.37 ± 0.18              | 0.85 ± 0.01 <sup>°</sup>   |

**Spinal cord**

| N=5           | Vehicle     | KW          | Cisplatin   | Cisplatin + KW           |
|---------------|-------------|-------------|-------------|--------------------------|
| <i>I11b</i>   | 1.00 ± 0.07 | 0.77 ± 0.12 | 1.29 ± 0.19 | 1.13 ± 0.04              |
| <i>Ccl2</i>   | 1.00 ± 0.18 | 1.09 ± 0.25 | 0.88 ± 0.28 | 1.46 ± 0.06              |
| <i>Selp</i>   | 1.00 ± 0.12 | 0.95 ± 0.19 | 1.52 ± 0.16 | 1.37 ± 0.21              |
| <i>C3</i>     | 1.00 ± 0.03 | 0.87 ± 0.17 | 1.47 ± 0.30 | 1.11 ± 0.10              |
| <i>Cxcl10</i> | 1.00 ± 0.13 | 1.07 ± 0.26 | 1.43 ± 0.21 | 0.85 ± 0.08              |
| <i>Cxcl12</i> | 1.00 ± 0.17 | 1.10 ± 0.18 | 0.90 ± 0.15 | 1.10 ± 0.00              |
| <i>Tnf</i>    | 1.00 ± 0.12 | 0.99 ± 0.09 | 1.36 ± 0.22 | 0.87 ± 0.20 <sup>°</sup> |
| <i>Il6</i>    | 1.00 ± 0.19 | 0.80 ± 0.08 | 1.03 ± 0.23 | 0.71 ± 0.07              |
